# Supplementary material for: Multiple receptor tyrosine kinase activation attenuates therapeutic efficacy of the fibroblast growth factor receptor 2 inhibitor AZD4547 in FGFR2 amplified gastric cancer
Source: PubMed Central journal article supplement (PMC4385832; doi:10.18632/oncotarget.2987), 2014-12-10
Supplement: oncotarget-06-2009-s001.pdf [file oncotarget-06-2009-s001.pdf]

## Multiple receptor tyrosine kinase activation attenuates therapeutic efficacy of the fibroblast growth factor receptor 2 inhibitor AZD4547 in *FGFR2* amplified gastric cancer

### Supplementary Material

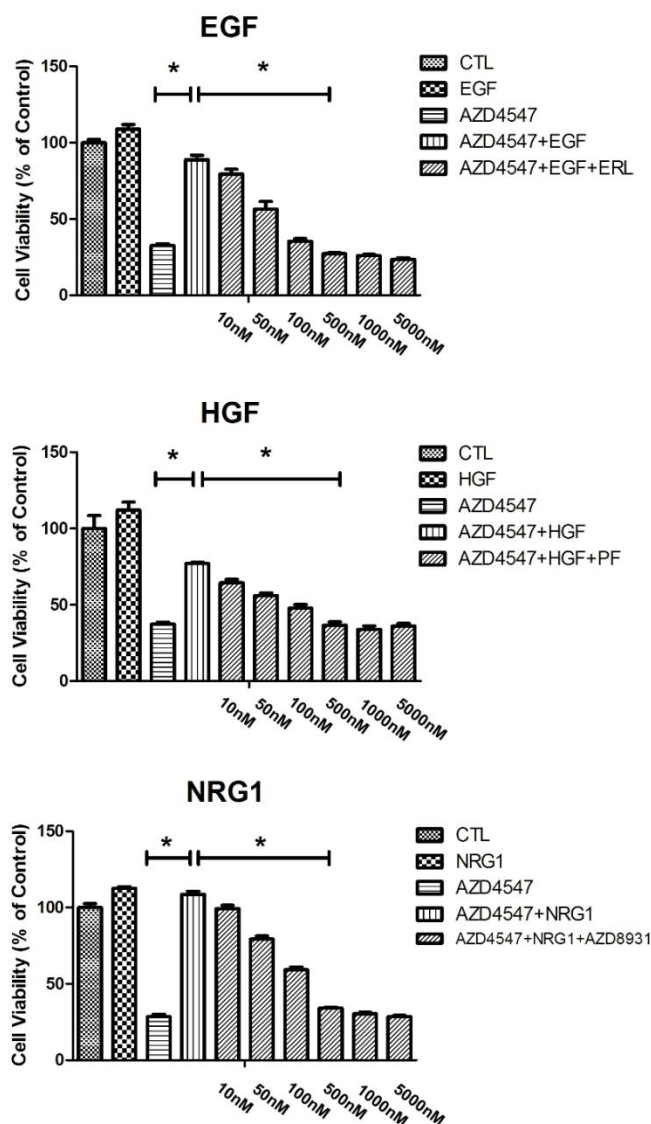

**Figure S1: Ligand induced AZD4547 hyposensitivity was reversed by corresponding RTK inhibitors.** SNU-16 cells were treated with AZD4547 (5 nM), AZD4547 and ligands (50 ng/mL), or AZD4547, ligands and different concentrations of RTK inhibitor (10 nM-5000 nM) for 72 hours and then analyzed by CCK-8 assay. Note that 500 nM of RTK inhibitors could reverse ligand-induced AZD4547 hyposensitivity. PF, PF04217903; ERL, erlotinib. Data (n = 6) are represented as mean  $\pm$  SD. \*,  $p < 0.01$ .

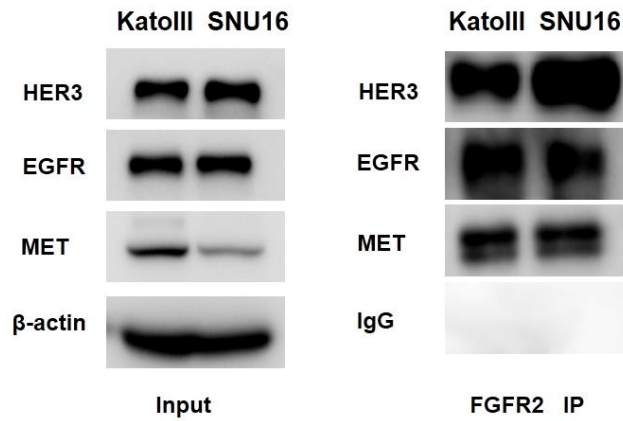

**Figure S2: Ligand-induced AZD4547 resistance correlates with baseline overexpression of certain RTK proteins.** Left panel: Immunoblots showing the baseline expression status of the indicated RTKs. Right panel: Co-immunoprecipitation showing the distribution of heterodimers between the FGFR2 receptor and indicated RTKs. FGFR2 was immunoprecipitated from whole cell lysates and immunoblotted for the indicated RTKs. Irrelevant IgG serves as a negative control.

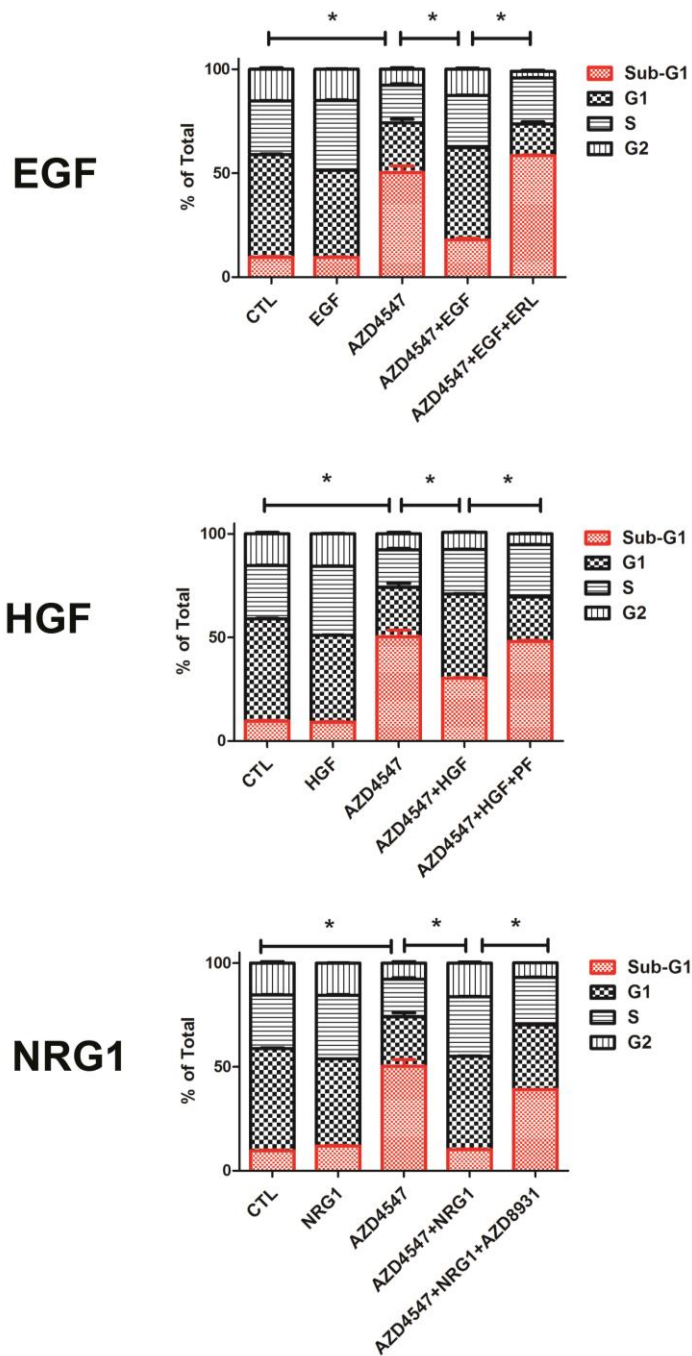

**Figure S3: EGF, NRG1 and HGF reversed AZD4547-induced cell cycle arrest in SNU-16 cells.** Cells were exposed to AZD4547 (10 nM), AZD4547 and ligands (50 ng/mL) or AZD4547, ligands and second RTK inhibitor (10  $\mu$ M) for 72 hours and then analyzed for their cell-cycle distribution using flow cytometry. PF, PF04217903; ERL, erlotinib. Data are represented as mean  $\pm$  SD. \*,  $p < 0.001$
